# Supplementary material
Source: Springer Nature journal article supplement (https://www.springermedizin.de/resource/supplementary/12879_2009_1153_MOESM5_ESM.pdf/9441970)

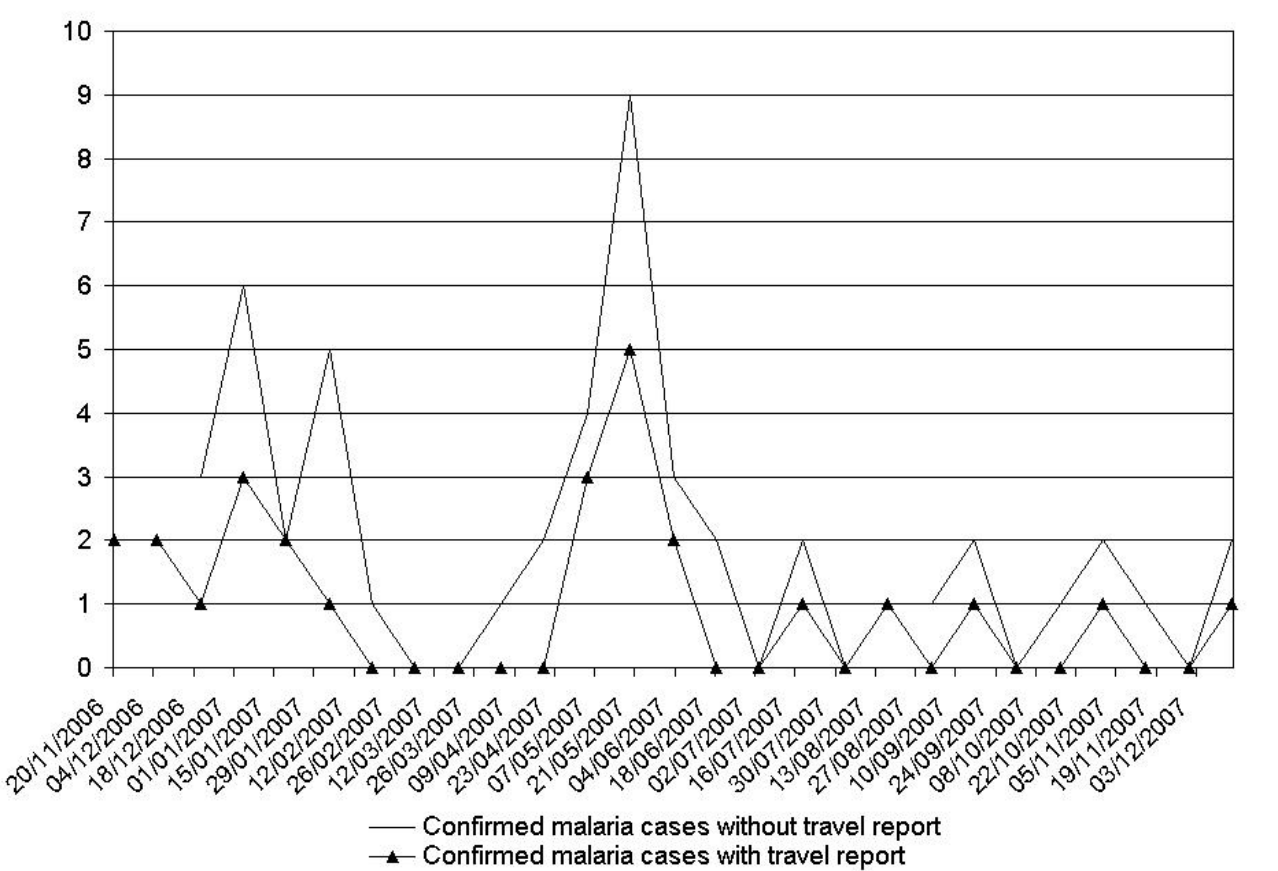

Supplement: MOESM5 [file 9441970]
